# Supplementary material for: Combining Sensitive Crossmatch Assays With Donor/Recipient Human Leukocyte Antigen Eplet Matching Predicts Living-Donor Kidney Transplant Outcome
Source: PubMed Central journal article supplement — Kidney Int Rep. 2018 Mar 30;3(4):926–38. doi: 10.1016/j.ekir.2018.03.015 (PMC6035161; doi:10.1016/j.ekir.2018.03.015), 2018-03-30
Supplement: mmc1.pdf [file mmc1.pdf]

## Supplementary material

**Supplemental Table 1:** Accuracy of the different humoral alloimmune assays predicting AR and different types of acute rejection

| <b>Assay</b>           | <b>Accuracy</b> | <b>AR</b> | <b>TCMR</b> | <b>ABMR</b> |
|------------------------|-----------------|-----------|-------------|-------------|
| <b>CDC-PRA &gt;20%</b> | PPV             | 31        | 3           | 14          |
|                        | NPV             | 82        | 87          | 95          |
|                        | Se              | 17        | 2           | 26          |
|                        | Sp              | 91        | 88          | 90          |
| <b>CDC-PRA &gt;80%</b> | PPV             | 50        | 0           | 37          |
|                        | NPV             | 81        | 88          | 95          |
|                        | Se              | 6         | 0           | 16          |
|                        | Sp              | 98        | 97          | 98          |
| <b>FC-XM +</b>         | PPV             | 47        | 12          | 18          |
|                        | NPV             | 82        | 88          | 95          |
|                        | Se              | 12        | 5           | 16          |
|                        | Sp              | 96        | 95          | 96          |
| <b>DSA +</b>           | PPV             | 50        | 6           | 33          |
|                        | NPV             | 83        | 88          | 97          |
|                        | Se              | 23        | 5           | 53          |
|                        | Sp              | 94        | 90          | 94          |
| <b>DSAC3d +</b>        | PPV             | 66        | 5           | 44          |
|                        | NPV             | 83        | 88          | 96          |
|                        | Se              | 18        | 2           | 42          |
|                        | Sp              | 98        | 94          | 97          |

CDC-PRA: complement dependent cytotoxicity panel reactive antibodies; FC-XM: Flow cytometry cross match; DSA: donor specific antibody (solid-phase assay); DSAC3d: C3d binding donor specific antibody; AR: acute rejection; TCMR: T cell mediated rejection; ABMR: antibody-mediated rejection; PPV: positive predictive value; NPV: negative predictive value
