# Supplementary material for: Combining Sensitive Crossmatch Assays With Donor/Recipient Human Leukocyte Antigen Eplet Matching Predicts Living-Donor Kidney Transplant Outcome
Source: PubMed Central journal article supplement — Kidney Int Rep. 2018 Mar 30;3(4):926–38. doi: 10.1016/j.ekir.2018.03.015 (PMC6035161; doi:10.1016/j.ekir.2018.03.015), 2018-03-30
Supplement: mmc2.pdf [file mmc2.pdf]

**Supplemental Table 2.** Univariate and multivariate binary logistical regression for ABMR excluding patients with positive pre-transplant humoral immune assays (PRA<20%; FC-XM-; DSA-; DSAC3d-: 278 patients)

| Variable                   | UNIVARIATE  |            |             | MULTIVARIATE |           |              |
|----------------------------|-------------|------------|-------------|--------------|-----------|--------------|
|                            | OR          | 95% CI     | p           | OR           | 95% CI    | p            |
| Recipient age years        | 0.93        | 0.95-1.05  | 0.99        |              |           |              |
| Donor gender F             | 0.91        | 0.17-4.76  | 0.91        |              |           |              |
| Time on dialysis (months)  | 0.99        | 0.98-1.02  | 0.92        |              |           |              |
| Transplant number > 1 vs 1 | 0.39        | 0.72-2.05  | 0.26        |              |           |              |
| Induction treatment: rATG  | 0.3         | 0.66-1.39  | 0.12        |              |           |              |
| CNI free IS regimen: YES   | 8.87        | 0.89-87.94 | 0.06        | 9.82         | 0.89-108  | 0.062        |
| HLA allele mismatches      | 1.24        | 0.73-2.10  | 0.42        |              |           |              |
| HLA eplet mismatches       |             |            |             |              |           |              |
| - Class I (A,B)            | 1.07        | 0.95-1.20  | 0.26        |              |           |              |
| - Class II: - DR           | <b>1.14</b> | 1.02-1.27  | <b>0.02</b> | <b>1.14</b>  | 1.02-1.28 | <b>0.019</b> |
| - DQ                       | 1.05        | 0.96-1.16  | 0.27        |              |           |              |

rATG: rabbit anti-thymocyte globulin (Thymoglobulin®); CNI: Calcineurin inhibitor
