# Supplementary material for: Combining Sensitive Crossmatch Assays With Donor/Recipient Human Leukocyte Antigen Eplet Matching Predicts Living-Donor Kidney Transplant Outcome
Source: PubMed Central journal article supplement — Kidney Int Rep. 2018 Mar 30;3(4):926–38. doi: 10.1016/j.ekir.2018.03.015 (PMC6035161; doi:10.1016/j.ekir.2018.03.015), 2018-03-30
Supplement: mmc3.pdf [file mmc3.pdf]

**Supplemental Figure 1.** Comparison of mean number of Eplet-mismatches in patients experiencing acute rejection episodes.

**S1a.** Acute rejection.

**S1b.** T cell mediated rejection.

**S1c.** Antibody-mediated rejection.

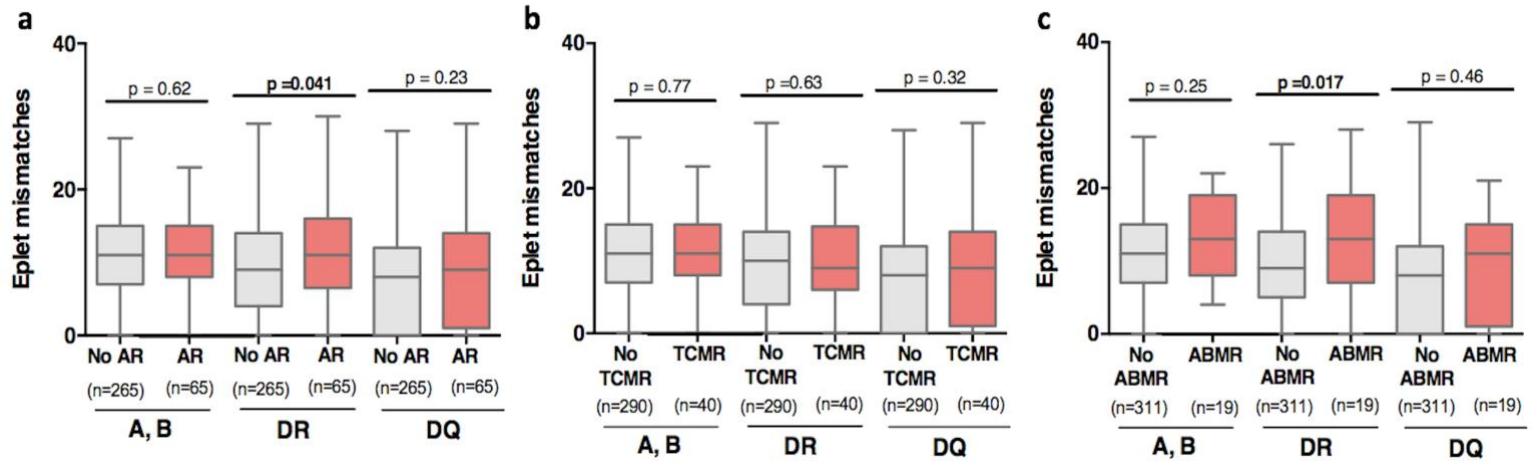

AR: acute rejection; TCMR: T cell mediated rejection; ABMR: antibody-mediated rejection

\* Patients not experiencing AR vs AR: AB Eplet-mismatches:  $11.3 \pm 6$  vs  $11.8 \pm 5$ ,  $p=0.62$ ; DR Eplet-mismatches:  $9.2 \pm 7$  vs  $11.1 \pm 7$ ,  $p=0.04$ ; DQ Eplet-mismatches:  $7.8 \pm 7$  vs  $9 \pm 8$ ,  $p=0.23$ .

Patients not experiencing TCMR vs TCMR: AB Eplet-mismatches:  $11.4 \pm 6$  vs  $11.6 \pm 5$ ,  $p=0.77$ ; DR Eplet-mismatches:  $9.5 \pm 7$  vs  $10 \pm 6$ ,  $p=0.63$ ; DQ Eplet-mismatches:  $7.9 \pm 7$  vs  $9.1 \pm 8$ ,  $p=0.32$ .

Patients not experiencing ABMR vs ABMR: AB Eplet-mismatches:  $11.4 \pm 6$  vs  $12.9 \pm 5$ ,  $p=0.25$ ; DR Eplet-mismatches:  $9.3 \pm 7$  vs  $13.1 \pm 9$ ,  $p=0.17$ ; DQ Eplet-mismatches:  $7.9 \pm 7$  vs  $9.3 \pm 7$ ,  $p=0.46$ .
