# Supplementary material for: Combining Sensitive Crossmatch Assays With Donor/Recipient Human Leukocyte Antigen Eplet Matching Predicts Living-Donor Kidney Transplant Outcome
Source: PubMed Central journal article supplement — Kidney Int Rep. 2018 Mar 30;3(4):926–38. doi: 10.1016/j.ekir.2018.03.015 (PMC6035161; doi:10.1016/j.ekir.2018.03.015), 2018-03-30
Supplement: mmc4.pdf [file mmc4.pdf]

**Supplemental Figure 2.** Kidney allograft function progression according to the different immune assays.

**S2a.** Comparison between mean eGFR at 12 months, 24 months and 5 years according to incidence of acute rejection.

**S2b.** Comparison between mean eGFR at 12 months, 24 months and 5 years according to CDC-PRA (< or >20%).

**S2c.** Comparison between mean eGFR at 12 months, 24 months and 5 years according to CDC-PRA (< or >80%).

**S2d.** Comparison between mean eGFR at 12 months, 24 months and 5 years according to FC-XM positivity.

**S3e.** Comparison between mean eGFR at 12 months, 24 months and 5 years according to DSA positivity.

**S3f.** Comparison between mean eGFR at 12 months, 24 months and 5 years according to DSAC3d positivity.

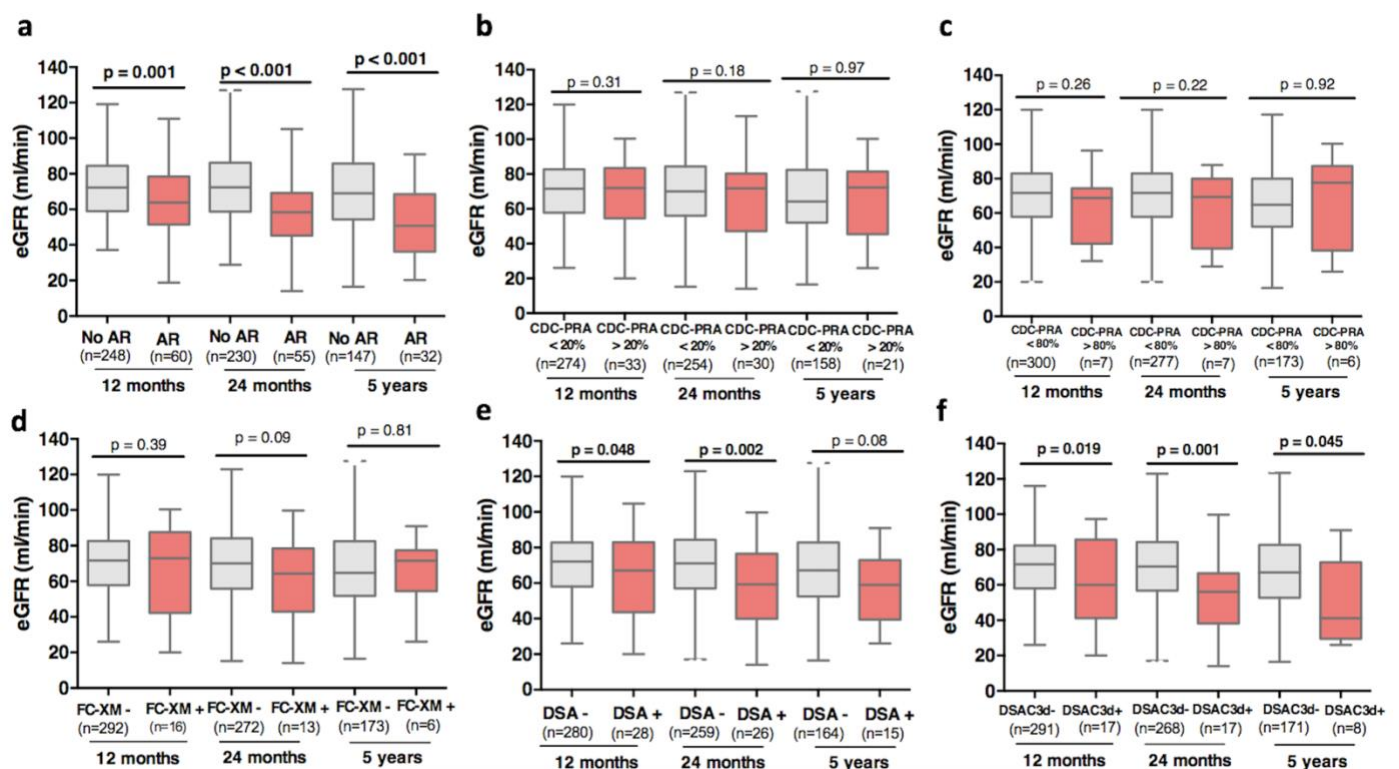

eGFR: estimated glomerular filtration rate; AR: Acute rejection; CDC-PRA: complement dependent cytotoxicity panel reactive antibodies; FC-XM: flow cytometry crossmatch; DSA: donor specific antibody (solid phase assay); DSAC3d: C3d binding donor specific antibody.

\* Patients not experiencing AR vs AR: 12months 73±19 vs 64±23 ml/min, p=0.001; 24months 73±20 vs 59±24ml/min, p<0.001; 5years 70±22 vs 53±24 ml/min, p<0.001. CDC-PRA <20% vs CDC-PRA>20%: 12months 72±20 vs 68±24 ml/min, p=0.31; 24months 71±21 vs 65±24 ml/min, p=0.17; 5years 67±23 vs 67±21 ml/min, p=0.94. CDC-PRA <80% vs CDC-PRA>80%: 12months 72±20 vs 63±21 ml/min, p=0.26; 24months 71±21 vs 61±24 ml/min, p=0.22; 5years 68±28 vs 66±23 ml/min, p=0.93. FC-XM- vs FC-XM+: 12months 72±20 vs 67±26 ml/min, p=0.39; 24months 71±21 vs 61±26 ml/min, p=0.09; 5years: 67±23 vs 65±22 ml/min, p=0.81. DSA- vs DSA+: 12months 72±20 vs 64±23 ml/min, p=0.048; 24 months 71±21 vs 58±23 ml/min, p=0.002; 5years 68±23 vs 57±20 ml/min, p=0.08. DSAC3d- vs DSAC3d+: 12months 72±20

vs  $60 \pm 24$  ml/min,  $p=0.019$ ; 24months  $71 \pm 21$  vs  $54 \pm 23$  ml/min,  $p=0.001$ , 5years  $68 \pm 23$  vs  $51 \pm 24$  ml/min,  $p=0.045$ .
